# Supplementary material for: Deletion of NFKB1 enhances canonical NF-κB signaling and increases macrophage and myofibroblast content during tendon healing
Source: PubMed Central journal article supplement (PMC6662789; doi:10.1038/s41598-019-47461-5), 2019-07-29

## **Supplementary Information**

### **Deletion of NFKB1 enhances canonical NF- $\kappa$ B signaling and increases macrophage and myofibroblast content during tendon healing**

Katherine T. Best, Fredella K. Lee, Emma Knapp, Hani A. Awad, Alayna E. Loiselle

| WT |             |             |                 | <i>NFKB1</i> <sup>Het</sup> |             |             |                 | <i>NFKB1</i> <sup>KO</sup> |             |             |                 |                 |
|----|-------------|-------------|-----------------|-----------------------------|-------------|-------------|-----------------|----------------------------|-------------|-------------|-----------------|-----------------|
|    | 1           | 2           | 3               | 4                           | 5           | 6           | 7               | 8                          | 9           | 10          | 11              | 12              |
| A  | Acta2<br>1  | Acta2<br>1  | S100a4<br>9     | S100a4<br>9                 | Acta2<br>1  | Acta2<br>1  | S100a4<br>9     | S100a4<br>9                | Acta2<br>1  | Acta2<br>1  | S100a4<br>9     | S100a4<br>9     |
| B  | Ccl2<br>2   | Ccl2<br>2   | Tnf<br>10       | Tnf<br>10                   | Ccl2<br>2   | Ccl2<br>2   | Tnf<br>10       | Tnf<br>10                  | Ccl2<br>2   | Ccl2<br>2   | Tnf<br>10       | Tnf<br>10       |
| C  | Ccl5<br>3   | Ccl5<br>3   | Gapdh<br>11     | Gapdh<br>11                 | Ccl5<br>3   | Ccl5<br>3   | Gapdh<br>11     | Gapdh<br>11                | Ccl5<br>3   | Ccl5<br>3   | Gapdh<br>11     | Gapdh<br>11     |
| D  | Col1a1<br>4 | Col1a1<br>4 | Rplp0<br>12/Ref | Rplp0<br>12/Ref             | Col1a1<br>4 | Col1a1<br>4 | Rplp0<br>12/Ref | Rplp0<br>12/Ref            | Col1a1<br>4 | Col1a1<br>4 | Rplp0<br>12/Ref | Rplp0<br>12/Ref |
| E  | Col3a1<br>5 | Col3a1<br>5 | Rps18<br>13/Ref | Rps18<br>13/Ref             | Col3a1<br>5 | Col3a1<br>5 | Rps18<br>13/Ref | Rps18<br>13/Ref            | Col3a1<br>5 | Col3a1<br>5 | Rps18<br>13/Ref | Rps18<br>13/Ref |
| F  | Emr1<br>6   | Emr1<br>6   | gDNA<br>gDNA    | PCR<br>PCR                  | Emr1<br>6   | Emr1<br>6   | gDNA<br>gDNA    | PCR<br>PCR                 | Emr1<br>6   | Emr1<br>6   | gDNA<br>gDNA    | PCR<br>PCR      |
| G  | Hif1a<br>7  | Hif1a<br>7  | RQ1<br>RQ 1     | RQ2<br>RQ 2                 | Hif1a<br>7  | Hif1a<br>7  | RQ1<br>RQ 1     | RQ2<br>RQ 2                | Hif1a<br>7  | Hif1a<br>7  | RQ1<br>RQ 1     | RQ2<br>RQ 2     |
| H  | Il1b<br>8   | Il1b<br>8   | RT<br>RT        | Empty                       | Il1b<br>8   | Il1b<br>8   | RT<br>RT        | Empty                      | Il1b<br>8   | Il1b<br>8   | RT<br>RT        | Empty           |
|    | 1           | 2           | 3               | 4                           | 5           | 6           | 7               | 8                          | 9           | 10          | 11              | 12              |

Emr1 is also known as *Adgre1* and is referred to as such in text.

**Supplemental Figure 1. Custom PCR Array Plate.** Custom Biorad PrimePCR array plate containing genes related to matrix deposition, macrophages, myofibroblasts, and inflammation. Three housekeeping genes (*Gapdh*, *Rplp0*, and *Rps18*) were included.

Full Unedited Gels for Figure 1

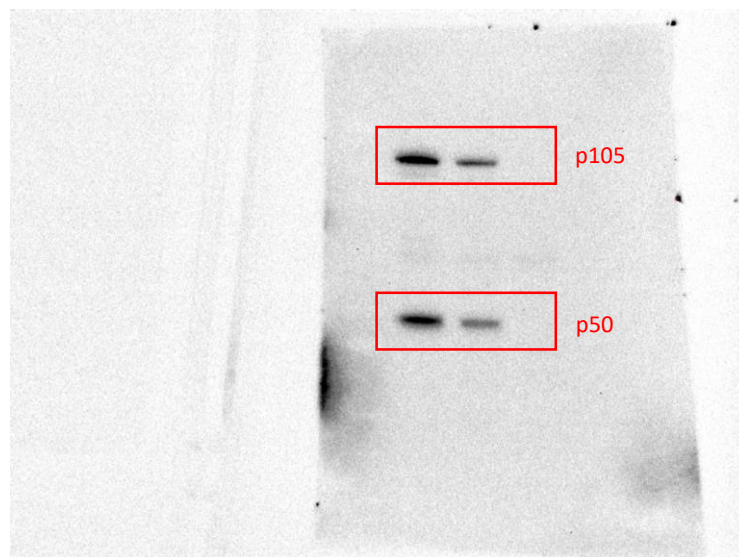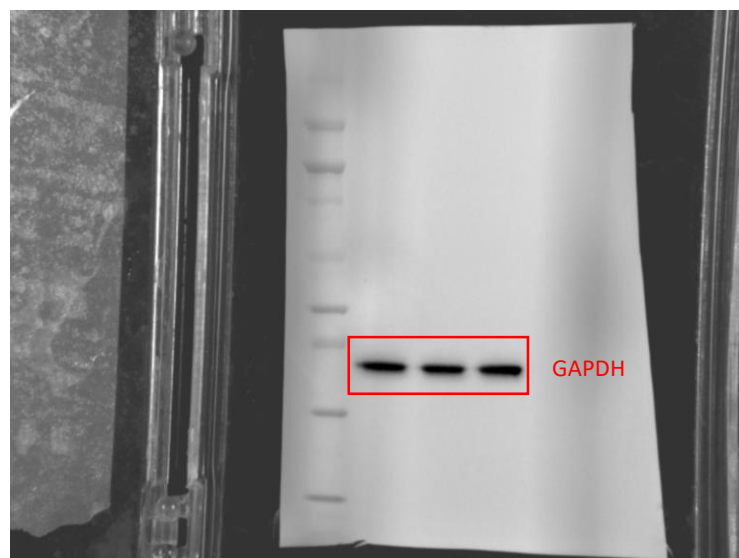

Full Unedited Gels for Figure 2 (Uninjured)

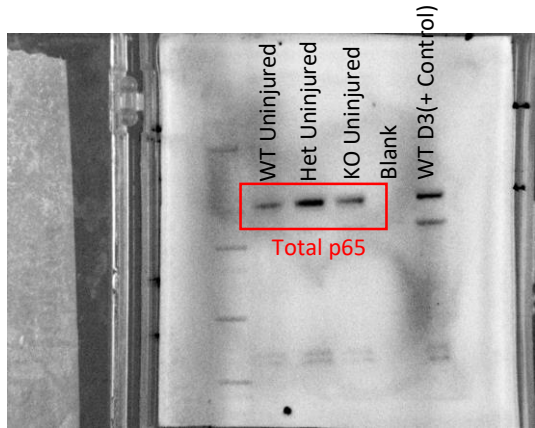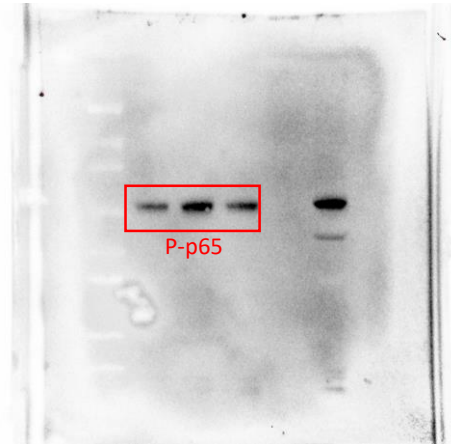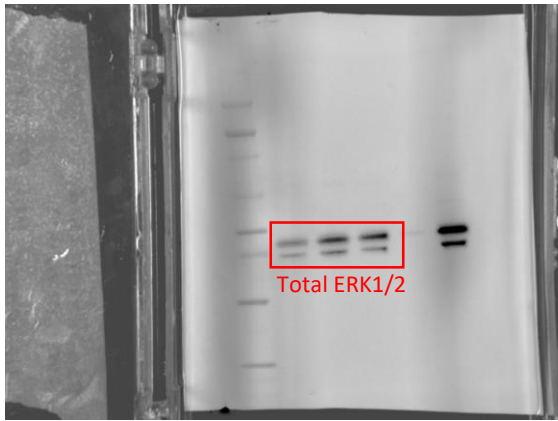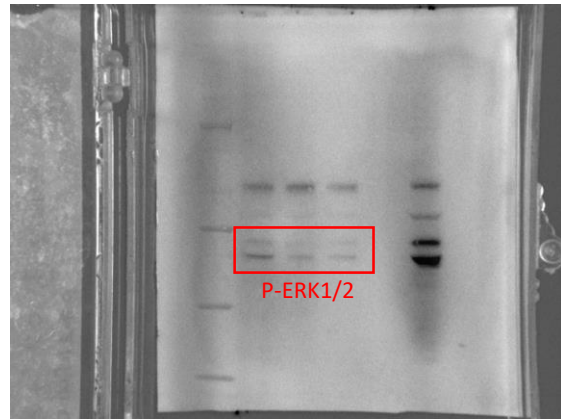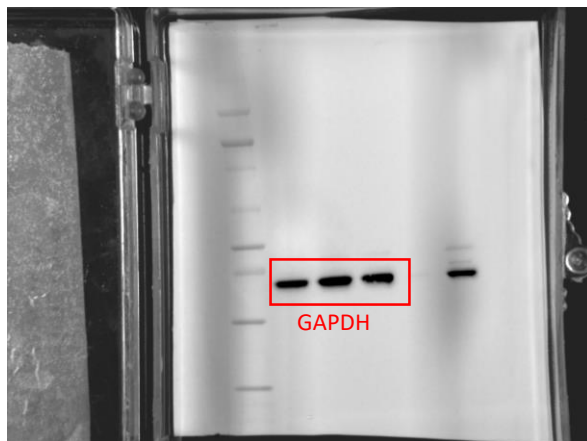

Full Unedited Gels for Figure 2 (Day 3 Repair)

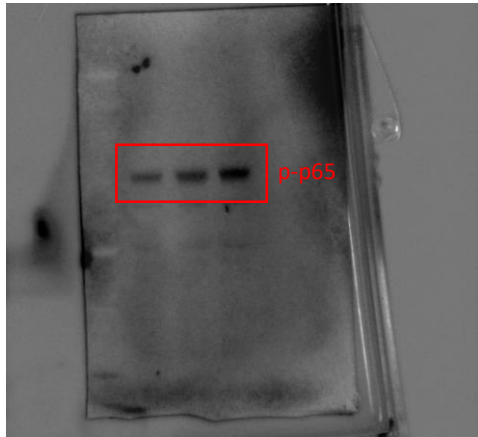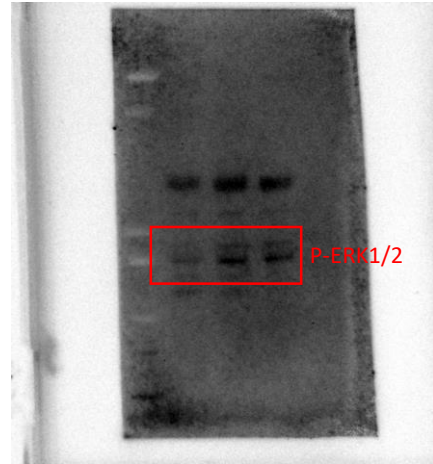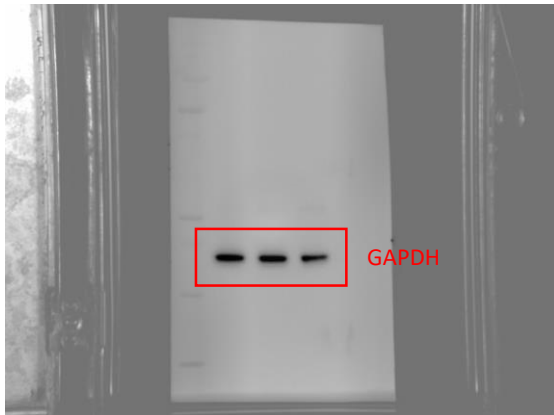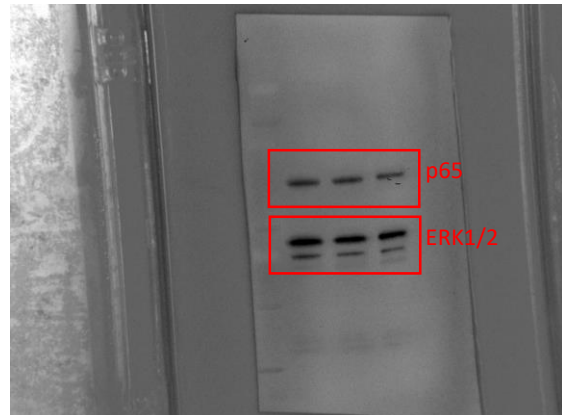

Full Unedited Gels for Figure 2 (Day 14 Repair)

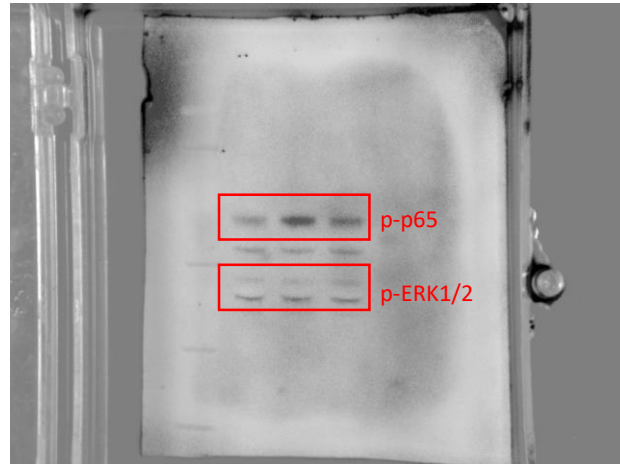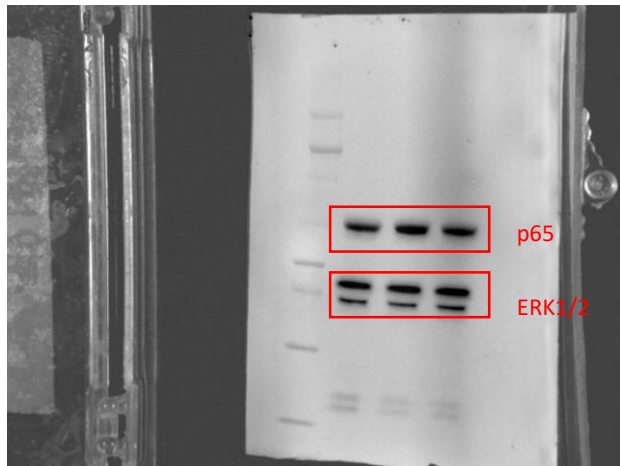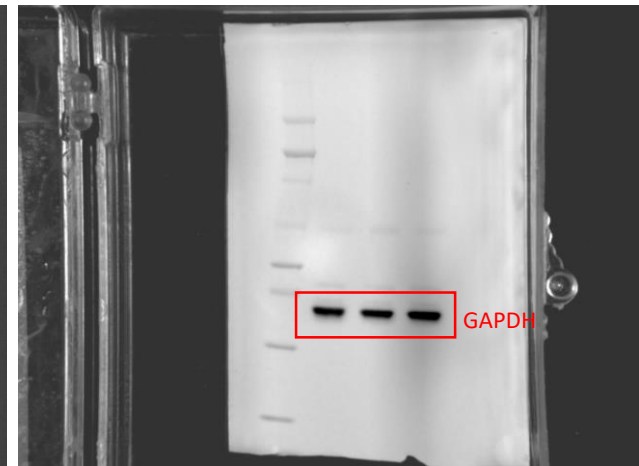

Supplement: 41598_2019_47461_MOESM1_ESM.pdf [file 41598_2019_47461_MOESM1_ESM.pdf]
